# Supplementary material for: Polygenic hazard score is associated with prostate cancer in multi-ethnic populations
Source: Springer Nature journal article supplement (doi:10.1038/s41467-021-21287-0), 2021-02-23
Supplement: MOESM3 [file 41467_2021_21287_MOESM3_ESM.pdf]

### **Description of Additional Supplementary Files**

File Name: Supplementary Software 1

Description: Code used in analyses
